# Supplementary material
Source: PubMed Central journal article supplement (PMC6646122)
Supplement: ao8b00785_si_001.pdf [file ao8b00785_si_001.pdf]

# Controlled Dye Aggregation in SDS Stabilized PMMA Nanoparticles as Fluorescent Imaging Probes

Samarth Bhargava<sup>a</sup>, Justin Jang Hann Chu,<sup>b</sup> and Suresh Valiyaveetil<sup>a,\*</sup>

<sup>a</sup>Department of Chemistry, National University of Singapore, 3 Science Drive 3, Singapore 117543

<sup>b</sup>Department of Microbiology and Immunology, National University of Singapore, 5 Science Drive 2, Singapore 117545

\*chmsv@nus.edu.sg

## Supporting Information

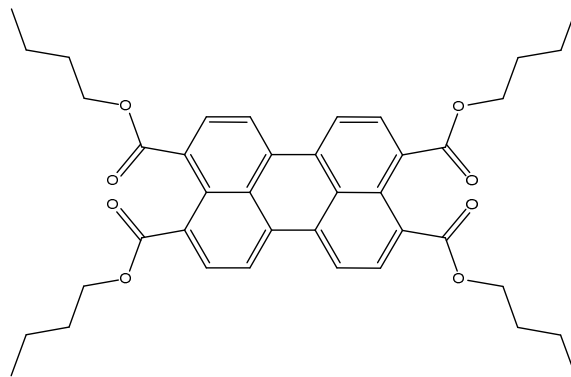

Figure S1: Structure of Perylene Tetrabutylester (PTE).

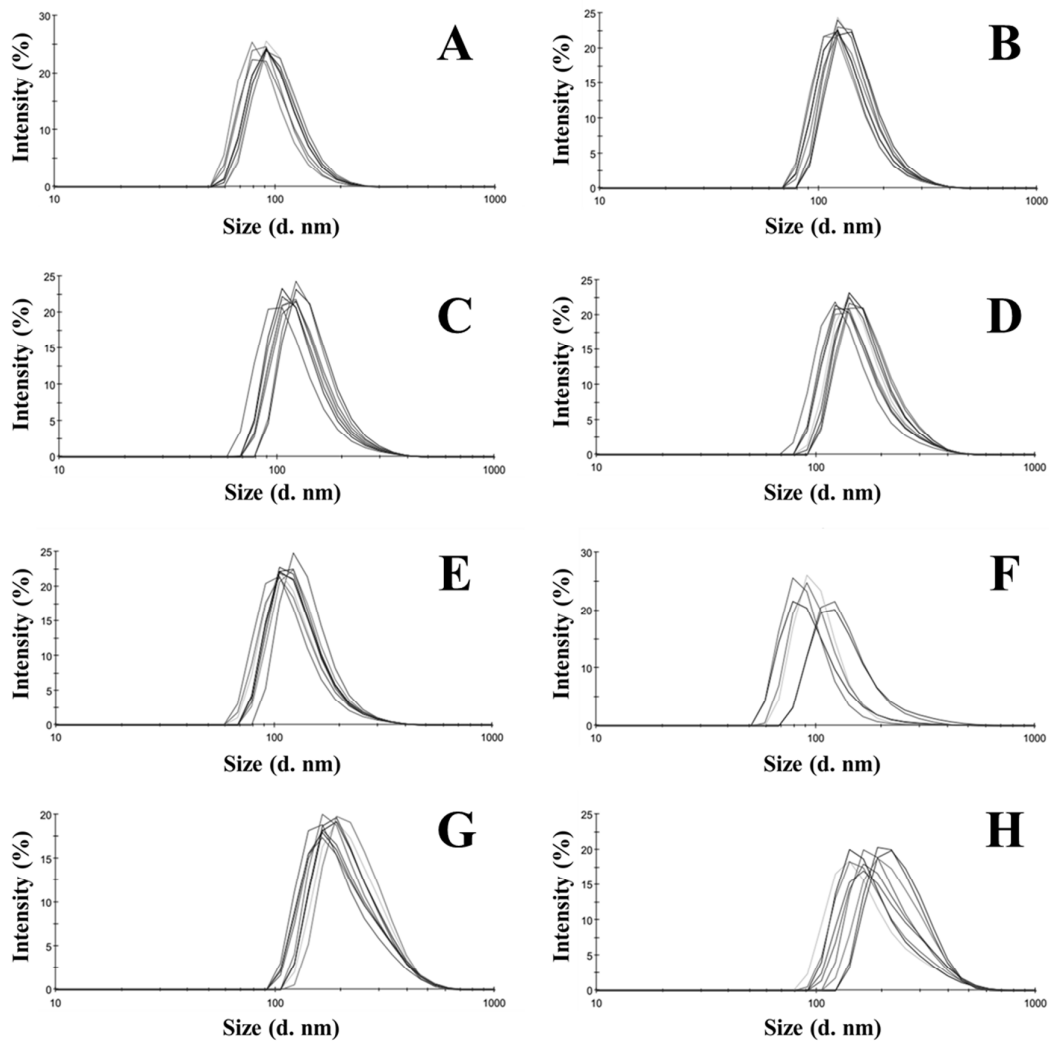

Figure S2: Dynamic Light Scattering graphs of PMMA nanoparticles with variable quantities of SDS used to stabilize particles. The nanoparticles were prepared using 50 mL stock solutions with a 200 mg basis of PMMA with (A) 0 wt% SDS, (B) 0.19 wt% SDS, (C) 0.38 wt% SDS, (D) 0.95 wt% SDS, (E) 1.89 wt% SDS, (F) 3.7 wt% SDS, (G) 8.77 wt% SDS, (H) 16.12 wt% SDS.

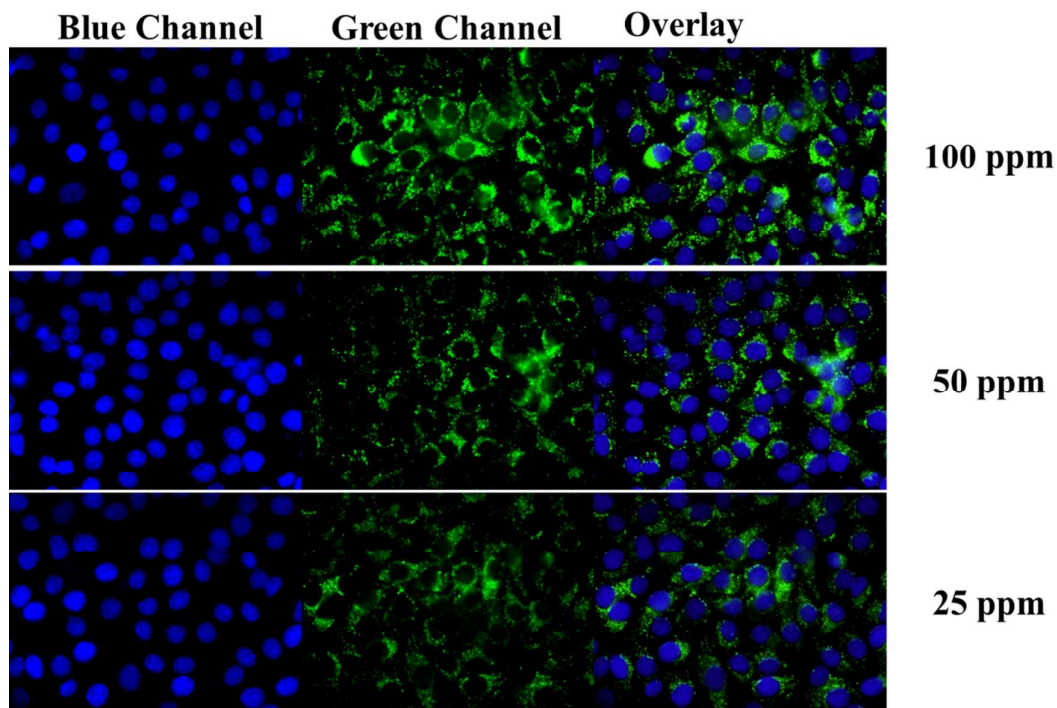

Figure S3: Exposure to nanoparticles at varying concentrations. Blue signals from DAPI stain and green signals from nanoparticles.

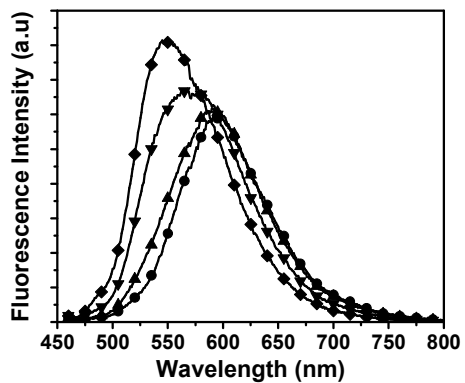

Figure S4: Fluorescence of dilute nanoparticle solutions (20 ppm) shows minor differences in trend between the concentrated solution and diluted nanoparticle solution with PTE loading varied from (-♦-) 5 wt%, (-▼-) 10 wt%, (-▲-) 17.5 wt% and (-●-) 25 wt%.

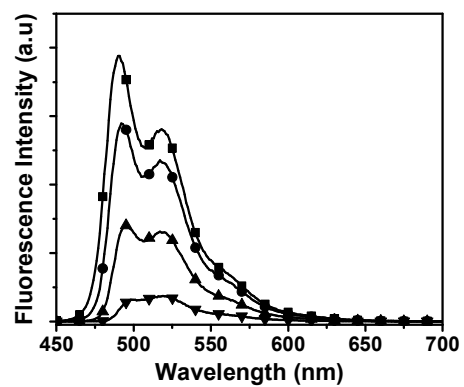

Figure S5: Fluorescence of PTE dye in DCM at concentrations of 25  $\mu\text{M}$  (- $\nabla$ -), 50  $\mu\text{M}$  (- $\blacktriangle$ -), 100  $\mu\text{M}$  (- $\bullet$ -), 200  $\mu\text{M}$  (- $\blacksquare$ -). The effective concentration of PTE in the PTE-PMMA nanoparticles was 3  $\mu\text{M}$  – 150  $\mu\text{M}$  (0.5 wt% - 25 wt%).
